# Supplementary material for: Alteration of innate lymphoid cell homeostasis mainly concerns salivary glands in primary Sjögren’s syndrome
Source: HighWire-hosted journal article supplement (doi:10.1136/rmdopen-2023-003051), 2023-05-01
Supplement: rmdopen-2023-003051supp001_data_supplement.pdf [file rmdopen-2023-003051supp001_data_supplement.pdf]

## SUPPLEMENTARY MATERIAL

Supplementary Table S1: Participant characteristics

|                                               | PERIPHERAL BLOOD ANALYSIS |                         | MINOR SALIVARY GLAND ANALYSIS |
|-----------------------------------------------|---------------------------|-------------------------|-------------------------------|
|                                               | pSS patients (n=21)       | Healthy controls (n=28) | pSS patients (n=16)           |
| <b>Demographic</b>                            |                           |                         |                               |
| Sex (female), n (%)                           | 20 (95.2)                 | 23 (82.1)               | 13 (81.2)                     |
| Age (years), median (IQR)                     | 56 (42.5-68)              | 55 (28.3-55)*           | 54 (39.8-58.8)                |
| <b>Disease characteristics</b>                |                           |                         |                               |
| Time from pSS diagnosis (years), median (IQR) | 8.5 (3.3-13.3)            |                         | 0 (0-6)                       |
| Positive anti-SSA antibodies, n (%)           | 15 (71.4)                 |                         | 9 (56.2)                      |
| Positive anti-SSB antibodies, n (%)           | 3 (14.3)                  |                         | 5 (31.2)                      |
| ClinESSDAI, median (IQR)                      | 0 (0-8)                   |                         | 3 (2-8)                       |
| ClinESSDAI > 0, n (%)                         | 9 (42.9)                  |                         | 12/15 (80)                    |
| ClinESSDAI > 4, n (%)                         | 7 (33.3)                  |                         | 7/15 (46.7)                   |
| <b>Minor salivary gland histology</b>         |                           |                         |                               |
| Focus score, median (IQR)                     | -                         |                         | 1.15 (1-2.75)                 |
| <b>Laboratory parameters</b>                  |                           |                         |                               |
| Positive rheumatoid factor, n (%)             | 9/17 (52.9)               |                         | 7/11 (63.6)                   |
| Lymphopenia, n (%)                            | 3 (14.3)                  |                         | 4 (25)                        |
| Hypergammaglobulinemia, n (%)                 | 7/20 (35.0)               |                         | 9 (56.2)                      |
| Cryoglobulinemia, n (%)                       | 3/18 (16.7)               |                         | 0/10 (0)                      |
| Hypocomplementemia, n (%)                     | 3/17 (17.8)               |                         | 2/9 (22.2)                    |
| <b>Treatment</b>                              |                           |                         |                               |
| Corticosteroids, n (%)                        | 2 (9.5)                   |                         | 4 (25)                        |
| Hydroxychloroquine, n (%)                     | 7 (33.3)                  |                         | 2 (15.4)                      |
| Methotrexate, n (%)                           | 1 (4.8)                   |                         | 1 (7.7)                       |

IQR: interquartile range, pSS: primary Sjögren's syndrome

\* Ages of 12 healthy controls who donated PB samples were 50 to 60 years old, but age was not precisely known, and age was considered 55 years old.

**Supplementary Table S2: Antibodies used for flow cytometry staining**

|         | Antibody   | Labeling      | Manufacturer  | Clone    |
|---------|------------|---------------|---------------|----------|
| Lineage | CD1a       | FITC          | BD Pharmingen | HI149    |
|         | CD3        | FITC          | Miltenyi      | BW264/56 |
|         | CD4        | FITC          | Miltenyi      | VIT4     |
|         | CD14       | FITC          | BD Pharmingen | M5E2     |
|         | CD16       | FITC          | Miltenyi      | REA423   |
|         | CD19       | FITC          | BD Pharmingen | HIB19    |
|         | CD34       | FITC          | Miltenyi      | AC136    |
|         | CD303      | FITC          | Biologend     | 201A     |
|         | FcεRI      | FITC          | eBioscience   | AER-37   |
| CD127   | PE         | BD Pharmingen | HIL-7R-M21    |          |
| CD45    | PE-Cy7     | BD Pharmingen | H130          |          |
| c-kit   | APC        | Miltenyi      | REA787        |          |
| CRTH2   | APC-Vio770 | Miltenyi      | REA598        |          |

FITC: fluorescein isothiocyanate; PE: phycoerythrin; Cy: cyanine; APC: allophycocyanine

**Supplementary Table S3: Antibodies used for immunofluorescence staining**

| Primary antibodies |            |                      |               | Secondary antibodies |               |          |
|--------------------|------------|----------------------|---------------|----------------------|---------------|----------|
| Antibody           | Isotype    | Clone                | Manufacturer  | Clone                | Manufacturer  | Labeling |
| CD127              | Rabbit IgG | 6H0T7                | Clinisciences | polyclonal           | Thermo Fisher | A488     |
| Lineage            | CD3        | Rat IgG              | KT3           | polyclonal           | Jackson       | Cy3      |
|                    | CD19       | Rat Ig2a, $\kappa$   | 6OMP31        |                      |               |          |
|                    | CD14       | Sheep IgG            | polyclonal    | polyclonal           | Jackson       | Cy3      |
|                    | CRTH2      | Mouse IgG1, $\kappa$ | G-12          | polyclonal           | Thermo Fisher | A647     |
|                    | T-bet      | Mouse IgG1, $\kappa$ | eBio4B10      |                      |               |          |

Cy: cyanine

## Supplementary Figures

### **Supplementary Figure 1: Peripheral blood analysis: frequency of total innate lymphoid cells (ILCs) and ILC1, 2 and 3 subsets and association with clinical and biological manifestations in primary Sjögren's syndrome (pSS).**

**(A)** Correlation between total ILC, ILC1, 2 and 3 subsets frequency and disease activity measured by ClinESSDAI in pSS patients (N=21). **(B)** Correlation between total ILC, ILC1, 2 and 3 subsets frequency and time from pSS diagnosis (N=21). **(C)** Total ILC, ILC1, 2 and 3 subsets frequency in pSS patients with or without glandular manifestations defined as active ESSDAI glandular domain (N=21). **(D)** Total ILC, ILC1, 2 and 3 subsets frequency in pSS patients with or without positive anti-SSA antibodies (N=21). **(E)** Total ILC, ILC1, 2 and 3 subsets frequency in pSS patients with or without positive anti-SSB antibodies (N=21).

Data are median +/-IQR. \*:  $p < 0.05$ ; \*\*:  $p < 0.01$ ; yr: years.

**Supplementary Figure 2:****Supplementary Figure 2: Minor salivary gland (MSG) analysis: quantity of ILC3 subset and association with clinical and biological manifestations in primary Sjögren's syndrome (pSS).**

**(A)** Correlation between the quantity of ILC3 subset in inflammatory infiltrates of pSS patient MSGs and the focus score (N=13). **(B)** Correlation between the quantity of ILC3 subset in inflammatory infiltrates of pSS patient MSGs and disease activity measured by ClinESSDAI (N=12). **(C)** Quantity of ILC3 subset in inflammatory infiltrates of pSS patient MSGs with altered or normal salivary flow ( $p>0.99$ ) (N=8). **(D)** Quantity of ILC3 subset in inflammatory infiltrates of pSS patient MSGs with positive or negative anti-SSA antibodies ( $p=0.52$ ) (N=13). **(E)** Quantity of ILC3 subset in inflammatory infiltrates of pSS patient MSGs with positive or negative anti-SSB antibodies ( $p=0.50$ ) (N=13). **(F)** Quantity of ILC3 subset in inflammatory infiltrates of pSS patient MSGs with positive or negative rheumatoid factor ( $p=0.76$ ) (N=10). **(G)** Quantity of ILC3 subset in inflammatory infiltrates of pSS patient MSGs with or without hypogammaglobulinemia ( $p=0.52$ ) (N=13).

Data are median +/-IQR. ILC: innate lymphoid cells.
