# Supplementary material for: Alteration of innate lymphoid cell homeostasis mainly concerns salivary glands in primary Sjögren’s syndrome
Source: HighWire-hosted journal article supplement (doi:10.1136/rmdopen-2023-003051), 2023-05-01

**A ClinESSDAI**

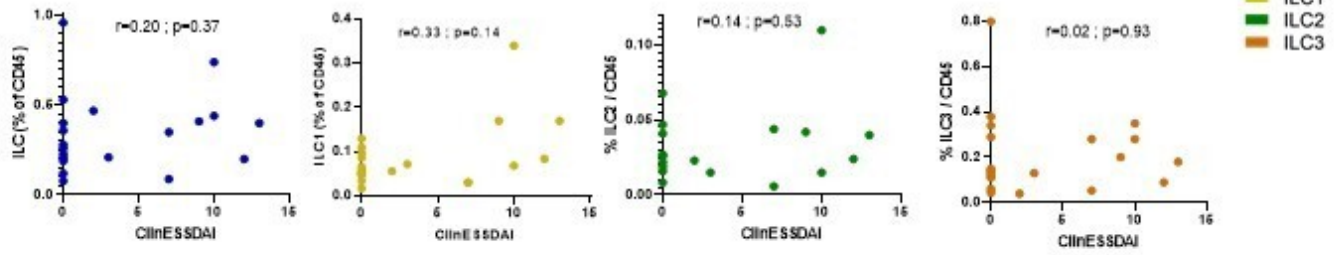

**B Time from pSS diagnosis**

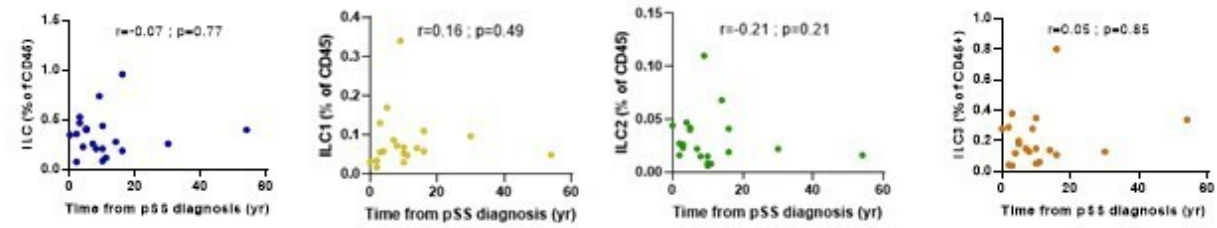

**C ESSDAI glandular domain**

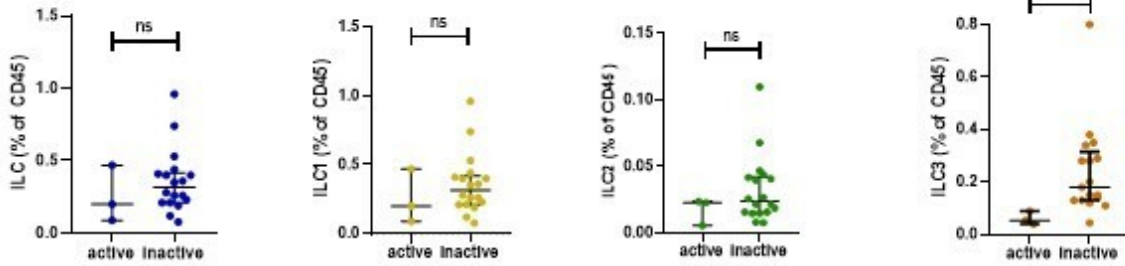

**D Anti-SSA antibodies**

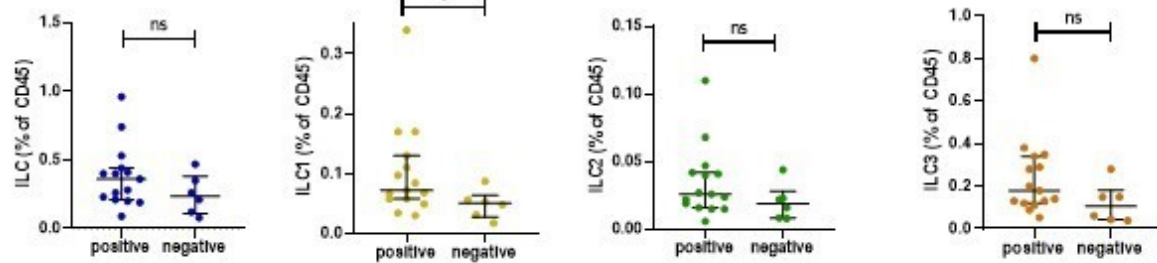

**E Anti-SSB antibodies**

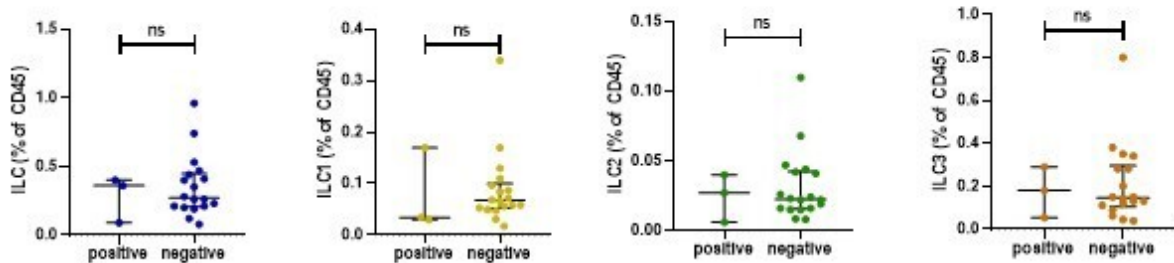

Supplement: rmdopen-2023-003051supp002_data_supplement.pdf [file rmdopen-2023-003051supp002_data_supplement.pdf]
